# Supplementary material for: Current Proteomic and Metabolomic Knowledge of Zygotic and Somatic Embryogenesis in Plants
Source: MDPI journal article supplement (doi:10.3390/ijms222111807), 2021-10-30
Supplement: s1 [file s1]

**Supplementary Table 1. Relevant data about proteomics and metabolomics regarding ZE and SE research reported in the reviewed literature**

(To see further information about SE experiments such as type of explant, medium formulation and growth conditions go to Supplemental Table 2)

|                                                                                                                                                                                                                                      | monocots                                                                                         | gymnosperms                                     |                       |                                      |                                                      |                                   |                                        |
|--------------------------------------------------------------------------------------------------------------------------------------------------------------------------------------------------------------------------------------|--------------------------------------------------------------------------------------------------|-------------------------------------------------|-----------------------|--------------------------------------|------------------------------------------------------|-----------------------------------|----------------------------------------|
| 1st STAGE: Ontogeny . ZE = early stages (before globular). Direct SE= induction; indirect SE = induction and proliferation (monocots: induction to early embryogenesis (embryogenic phase); gymnosperms: EC to PEM)                  |                                                                                                  |                                                 |                       |                                      |                                                      |                                   |                                        |
| Species                                                                                                                                                                                                                              | Sampled stage                                                                                    | Protein extraction                              | Separation            | MS identification <sup>†</sup>       | Identified elements <sup>‡</sup>                     | Type of analysis                  | Reference                              |
| <i>Acer platanoides</i> L                                                                                                                                                                                                            | Morphogenesis (10 WAF)                                                                           | 10% (w/v) TCA in acetone containing 20 mM DTT   | 2DE                   | ( <i>in-gel</i> ) LC- MS/MS          | 17 proteins                                          | <b>ZE proteomics</b>              | Staszak and Pawlowski, 2014            |
| <i>Gossypium hirsutum</i> L                                                                                                                                                                                                          | NEC, PEC, GSe                                                                                    | NA                                              | NA                    | UPLC-MS/MS                           | 581 metabolites                                      | SE metabolomics                   | Guo <i>et al.</i> , 2019               |
| <i>Gossypium hirsutum</i> L                                                                                                                                                                                                          | NEC, PEC, GSe                                                                                    | Phenol-ammonium sulphate/methanol precipitation | Liquid chromatography | (TMT) LC-MS/MS                       | 9369 proteins (6730 quantified)                      | SE quantitative proteomics        | Guo <i>et al.</i> , 2019b              |
| <i>Medicago truncatula</i>                                                                                                                                                                                                           | Induced and proliferating calli                                                                  | Acetone                                         | 2DE                   | ( <i>in-gel</i> ) MALDI-TOF/TOF MS   | 136 proteins                                         | SE proteomics                     | Almeida <i>et al.</i> , 2012           |
| <i>Nothapodytes nimmoniana</i>                                                                                                                                                                                                       | NEC and EC                                                                                       | Phenol-ammonium acetate                         | 2DE                   | ( <i>in-gel</i> ) MALDI-TOF/TOF MS   | 46 out of 97 spots                                   | SE proteomics                     | Isah and Umar, 2019                    |
| <i>Persea americana</i>                                                                                                                                                                                                              | NEC and EC                                                                                       | Phenol                                          | RP chromatography     | TMT-LC-(SPS)-MS3                     | 3841 proteins                                        | SE proteomics                     | Olivares-García <i>et al.</i> , 2020   |
| <i>Brachypodium distachyon</i>                                                                                                                                                                                                       | EC                                                                                               | NA                                              | NA                    | GC-MS                                | 79 metabolites                                       | SE metabolomics                   | Mamedes-Rodrigues <i>et al.</i> , 2018 |
| <i>Boesenbergia rotunda</i>                                                                                                                                                                                                          | EC                                                                                               | NA                                              | NA                    | UPLC-MS, targeted                    | 51 metabolites                                       | SE metabolomics                   | Ng <i>et al.</i> , 2016                |
| <i>Elaeis guineensis</i> Jacq.                                                                                                                                                                                                       | explant, 14 days of induction, primary callus and pro-embryogenic callus                         | Phenol-0.1 M ammonium acetate in methanol       | 2DE                   | ( <i>in-gel</i> ) MALDI-TOF/TOF MS   | 45 proteins                                          | SE proteomics                     | Silva <i>et al.</i> , 2014             |
| <i>Elaeis oleifera</i> , <i>E. guineensis</i>                                                                                                                                                                                        | Induction stage                                                                                  | Phenol                                          | Liquid chromatography | LC-MS/MS                             | 4695 in total; 221 daps                              | SE proteomics                     | Ribeiro <i>et al.</i> , 2019           |
| <i>Musa</i> spp.                                                                                                                                                                                                                     | EC and NEC induction                                                                             | Phenol-0.1 M ammonium acetate in methanol       | 2DE                   | ( <i>in-gel</i> ) MALDI-TOF/TOF MS   | 65 proteins                                          | SE proteomics                     | Kumaravel <i>et al.</i> , 2017         |
| <i>Zea mays</i>                                                                                                                                                                                                                      | EC induction                                                                                     | TCA                                             | iTRAQ-SCX             | UPLC-MS and iTRAQ LC-MS/MS           | 314 metabolites; 4,816 proteins                      | SE proteomics and metabolomics    | Ge <i>et al.</i> , 2017                |
| <i>Zea mays</i>                                                                                                                                                                                                                      | EC and NEC                                                                                       | Lysis buffer                                    | iTRAQ-SCX             | iTRAQ-LC-MS/MS                       | 5592 proteins; 632 daps                              | SE proteomics                     | Liu <i>et al.</i> , 2018               |
| <i>Zea mays</i>                                                                                                                                                                                                                      | EC and NEC                                                                                       | TCA-acetone                                     | 2DE                   | ( <i>in-gel</i> ) MALDI-TOF/TOF MS   | 29 proteins out of 42 spots                          | SE proteomics                     | Sun <i>et al.</i> , 2013               |
| <i>Zea mays</i>                                                                                                                                                                                                                      | EC and NEC                                                                                       | Phenol-0.1 M ammonium acetate in methanol       | 2DE                   | ( <i>in-gel</i> ) Q-TOF-MS           | 23 proteins out of 361 spots                         | SE proteomics                     | Varhaníková <i>et al.</i> , 2014       |
| <i>Cunninghamia lanceolata</i>                                                                                                                                                                                                       | Early embryogeny                                                                                 | Lysis buffer                                    | 2DE-DIGE              | ( <i>in-gel</i> ) LC-MALDI-TOF MS/MS | 71 proteins, 136 spots                               | <b>ZE proteomics</b>              | Shi <i>et al.</i> , 2010               |
| <i>Cunninghamia lanceolata</i>                                                                                                                                                                                                       | Early embryogeny                                                                                 | Lysis buffer                                    | 2DE-DIGE              | ( <i>in-gel</i> ) LC-MS/MS           | 11 proteins, 153 spots                               | <b>ZE proteomics</b>              | Zhen <i>et al.</i> , 2010              |
| <i>Araucaria angustifolia</i>                                                                                                                                                                                                        | EC                                                                                               | Acetone-chloroform                              | 2DE                   | ( <i>in-gel</i> ) MALDI-TOF /TOF MS  | 11 deps                                              | SE proteomics                     | Jo <i>et al.</i> , 2014                |
| <i>Araucaria angustifolia</i>                                                                                                                                                                                                        | EC                                                                                               | Methanol–chloroform                             | 2DE                   | ( <i>in-gel</i> ) LC-MS/MS           | 1932 (576 were annotated with Pinidae subclass data) | SE quantitative proteomics        | Fraga <i>et al.</i> , 2016             |
| <i>Araucaria angustifolia</i>                                                                                                                                                                                                        | EC                                                                                               | Methanol–chloroform                             | Liquid chromatography | LC-MS/MS                             | 1518                                                 | SE quantitative proteomics        | Douéttis-Peres <i>et al.</i> , 2019    |
| <i>Picea balfouriana</i>                                                                                                                                                                                                             | EC                                                                                               | NA                                              | NA                    | GC/TOF/MS                            | 123 metabolites                                      | SE metabolomics                   | Li <i>et al.</i> , 2015                |
| <i>Pseudotsuga menziesii</i> [mirb.]                                                                                                                                                                                                 | Proliferating EM                                                                                 | Extraction buffer                               | 1D-SDS-PAGE           | ( <i>in-gel</i> ) LC-MS/MS           | 4813                                                 | SE proteomics                     | Gautier <i>et al.</i> , 2018           |
| <i>Pseudotsuga menziesii</i> [mirb.]                                                                                                                                                                                                 | Proliferating EM and NEC                                                                         | Extraction buffer                               | 1D-SDS-PAGE           | ( <i>in-gel</i> ) LC-MS/MS           | 3028 total; 2619 dep                                 | SE proteomics                     | Gautier <i>et al.</i> , 2019           |
| 2nd STAGE: Development . Zygotic = globular-torpedo transition/ globular to coleoptilar/gymnosperms: after suspensor elongation   Indirect SE = globular-heart-torpedo transition; monocots: late embryo; gymnosperms: after PEM III |                                                                                                  |                                                 |                       |                                      |                                                      |                                   |                                        |
| Species                                                                                                                                                                                                                              | Sampled stage                                                                                    | Protein extraction                              | Separation            | MS Identification                    | Identified elements                                  | Type of analysis                  | Reference                              |
| <i>Cyclamen persicum</i>                                                                                                                                                                                                             | Globular (3WAP), torpedo (5WAP) and endosperm                                                    | Phenol                                          | 2DE                   | ( <i>in-gel</i> ) LC-MS/MS           | 62                                                   | <b>ZE proteomics</b>              | Mwangi <i>et al.</i> , 2013            |
| <i>Cyclamen persicum</i>                                                                                                                                                                                                             | Torpedo-staged zygotic and somatic embryos                                                       | NA                                              | NA                    | GC-Ion Trap MS                       | 52 metabolites                                       | <b>ZE Metabolomics</b>            | Winkelmann <i>et al.</i> , 2015        |
| <i>Cyclamen persicum</i>                                                                                                                                                                                                             | Torpedo zygotic embryo, Globular somatic embryo                                                  | Phenol                                          | 2DE                   | ( <i>in-gel</i> ) LC-Q-TOF/MS        | 23                                                   | Comparative                       | Winkelmann <i>et al.</i> , 2006        |
| <i>Cyclamen persicum</i>                                                                                                                                                                                                             | Torpedo zygotic embryo, globular and torpedo somatic embryos                                     | Phenol                                          | 2DE                   | ( <i>in-gel</i> ) MALDI-TOF/TOF MS   | 10 of 35 deps                                        | Comparative                       | Bian <i>et al.</i> , 2010              |
| <i>Cyclamen persicum</i>                                                                                                                                                                                                             | Torpedo-staged zygotic and somatic embryos                                                       | Phenol                                          | 2DE-DIGE              | ( <i>in-gel</i> ) LC- MS/MS          | 247 proteins out of 300 spots                        | Comparative                       | Rode <i>et al.</i> , 2011              |
| <i>Cyclamen persicum</i>                                                                                                                                                                                                             | EC, and globular, torpedo, cotyledonary somatic embryos                                          | Phenol                                          | 2DE                   | ( <i>in-gel</i> ) LC- MS/MS          | 108 deps (using a proteome reference map)            | SE proteomics                     | Rode <i>et al.</i> , 2012              |
| <i>Gossypium hirsutum</i> L                                                                                                                                                                                                          | Globular and cotyledonary somatic embryos                                                        | Phenol                                          | iTRAQ-HPLC            | LC-MS/MS                             | 6318                                                 | SE proteomics                     | Ge <i>et al.</i> , 2015                |
| <i>Theobroma cacao</i>                                                                                                                                                                                                               | Torpedo-staged zygotic and somatic embryos                                                       | Phenol                                          | 2DE                   | ( <i>in-gel</i> ) LC-MicroTOF-Q MS   | 32 proteins out of 53 spots                          | Comparative                       | Noah <i>et al.</i> , 2013              |
| 3rd STAGE: Maturation. Zygotic: accumulation of storage reserves. SE: cotyledonary stages (establishment of conversion potential)                                                                                                    |                                                                                                  |                                                 |                       |                                      |                                                      |                                   |                                        |
| Species                                                                                                                                                                                                                              | Sampled stage                                                                                    | Protein extraction                              | Separation            | MS Identification                    | Identified elements                                  | Type of analysis                  | Reference                              |
| <i>Acer platanoides</i> L                                                                                                                                                                                                            | Maturation (14- 22 WAF)                                                                          | 10% (w/v) TCA in acetone containing 20 mM DTT   | 2DE                   | ( <i>in-gel</i> ) LC- MS/MS          | 33 spots; 30 homologued proteins                     | <b>ZE proteomics</b>              | Staszak and Pawlowski, 2014            |
| <i>Thlaspi arvense</i> L                                                                                                                                                                                                             | Maturation of zyotic embryo (11, 13, 15,17 19 and 21 DAP)                                        | Boiling water                                   | -                     | GC/MS and LC-MS/MS                   | 112 metabolites                                      | <b>ZE metabolomics</b>            | Tsoogtbatar <i>et al.</i> 2015         |
| <i>Theobroma cacao</i>                                                                                                                                                                                                               | zygotic embryos: torpedo (14WAP), early cotyledon (16,18WAP), mature (20WAP). Late-torpedo in SE | Phenol                                          | 2DE                   | ( <i>in-gel</i> ) LC- Q-TOF MS       | 49 proteins, 72 spots                                | Comparative                       | Niemenak <i>et al.</i> , 2015          |
| <i>Carica papaya</i>                                                                                                                                                                                                                 | Somatic embryos maturation                                                                       | Methanol chloroform                             | -                     | LC-MS/MS                             | 522                                                  | SE proteomics                     | Almeida <i>et al.</i> , 2019           |
| <i>Triticum aestivum</i> L. cultivars a) Jinhua 9 and b) Zhongmai 175                                                                                                                                                                | Grain maturation (16, 21, 26, 32 and 37 DPA)                                                     | TCA-acetone                                     | 2DE-DIGE              | ( <i>in-gel</i> ) MALDI-TOF/TOF MS   | Deps identified: a) 138, b) 127                      | <b>ZE proteomics</b>              | Cao <i>et al.</i> , 2016               |
| <i>Oryza sativa</i>                                                                                                                                                                                                                  | Late morphogenesis and maturation                                                                | Acetone                                         | iTRAQ-SCX             | MALDI-TOF/TOF MS                     | 2165 identified proteins, 1744 quantified            | <b>ZE quantitative proteomics</b> | Zi <i>et al.</i> , 2013                |
| <i>Phoenix dactylifera</i> L                                                                                                                                                                                                         | Mature zygotic (23 WAP) and somatic embryos                                                      | TCA-acetone-phenol                              | 2DE                   | ( <i>in-gel</i> ) MALDI-TOF/TOF MS   | 23 proteins, 63 spots                                | Comparative                       | Sghaier-Hammami <i>et al.</i> , 2009a  |
| <i>Saccharum</i> spp.                                                                                                                                                                                                                | Maturation of EC and NEC                                                                         | TCA-acetone                                     | RP UPLC               | nanoUPLC-ESI-HDMS <sup>‡</sup> MS    | 1267                                                 | SE proteomics                     | Heringer <i>et al.</i> , 2015          |
| <i>Saccharum</i> spp.                                                                                                                                                                                                                | Maturation of somatic embryos                                                                    | Extraction buffer                               | Liquid chromatography | LC-MS/MS                             | 2611                                                 | SE proteomics                     | Reis <i>et al.</i> , 2016              |

|                                |                                                                                              |                                                                                              |                           |                                    |                                                         |                                        |                                       |
|--------------------------------|----------------------------------------------------------------------------------------------|----------------------------------------------------------------------------------------------|---------------------------|------------------------------------|---------------------------------------------------------|----------------------------------------|---------------------------------------|
| <i>Phoenix dactylifera</i> L   | Maturation (on ABA and Sucrose)                                                              | TCA–acetone–phenol                                                                           | 2DE                       | ( <i>in-gel</i> ) MALDI-TOF/TOF MS | 28                                                      | SE proteomics                          | Sghaier-Hammami <i>et al.</i> , 2010  |
| <i>Araucaria angustifolia</i>  | Mature zygotic embryo vs torpedo stage                                                       | TCA-acetone                                                                                  | 2DE                       | ( <i>in-gel</i> ) MALDI-TOF MS     | 8 differentially expressed polypeptides                 | <b>ZE proteomics</b>                   | Silveira <i>et al.</i> , 2008         |
| <i>Araucaria angustifolia</i>  | Mature and germinated zygotic embryo                                                         | Acetone-chloroform                                                                           | 1-DE, 2-DE                | LC-MS/MS                           | 32 in mature, 24 in germinated                          | <b>ZE proteomics</b>                   | Balbuena <i>et al.</i> , 2011         |
| <i>Cunninghamia lanceolata</i> | Cotyledonary zygotic embryos                                                                 | a) TCA-acetone, b) SDS extraction/acetone precipitation, c) Phenol/methanol-ammonium acetate | 2DE                       | ( <i>in-gel</i> ) LC-MS/MS         | a) 40, b) 47, c) 83                                     | <b>ZE proteomics</b>                   | Zhen and Shi, 2011                    |
| <i>Pinus pinaster</i>          | Cotyledonary-staged somatic and zygotic embryos                                              | Phenol                                                                                       | 2DE                       | ( <i>in-gel</i> ) LC-MS/MS         | 23 significant proteins overaccumulated in both embryos | Comparative                            | Morel <i>et al.</i> , 2014b           |
| <i>Pinus pinaster</i>          | Cotyledonary somatic embryos                                                                 | Phenol                                                                                       | 2DE                       | (in gel) LC-MS/MS                  | 56 proteins, 1428 spots                                 | SE proteomics and ABA determination by | Morel <i>et al.</i> , 2014a           |
| <i>Picea abies</i>             | Mature zygotic embryos                                                                       | NA                                                                                           | NA                        | GC-TOF/MS                          | 97 compounds                                            | SE metabolomics                        | Businge <i>et al.</i> , 2013          |
| <i>Picea glauca</i>            | Maturation of somatic embryos                                                                | NA                                                                                           | NA                        | NMR spectroscopy                   | 35 compounds                                            | SE metabolomics                        | Dowlatabadi <i>et al.</i> , 2009      |
| DEVELOPMENTAL SERIES           |                                                                                              |                                                                                              |                           |                                    |                                                         |                                        |                                       |
| <i>Jatropha curcas</i>         | Development at 5, 10, 15, 20, 25 and 30 DAF                                                  | TCA                                                                                          | 2DE                       | ( <i>in-gel</i> ) MALDI-TOF/TOF MS | 104 deps                                                | <b>ZE proteomics</b>                   | Liu <i>et al.</i> , 2013              |
| <i>Gossypium hirsutum</i> L    | Explant, NEC, EC and somatic embryos (globular, torpedo and cotyledonary -staged)            | Phenol                                                                                       | 2DE                       | (in gel) MALDI-TOF/TOF MS          | 155 deps                                                | SE proteomics                          | Zhou <i>et al.</i> , 2016             |
| <i>Silybum marianum</i> L.     | NEC, PEM, globular or cotyledonary somatic embryos, plantlet germination                     | NA                                                                                           | NA                        | TOF MS                             | 20 metabolites                                          | SE metabolomics                        | Khan <i>et al.</i> , 2015             |
| <i>Quercus suber</i> L.        | Proliferative, cotyledonary and mature somatic embryo                                        | Phenol-ammonium acetate-acetone                                                              | 2DE-DIGE                  | ( <i>in-gel</i> ) MALDI-MS/MS      | 44 proteins,66 spots                                    | SE proteomics                          | Gomez-Garay <i>et al.</i> , 2013      |
| <i>Phoenix dactylifera</i> L   | Morphogenesis (12, 14, 17 WAP), maturation (23 WAP) and germination                          | TCA-acetone-phenol                                                                           | 2DE                       | ( <i>in-gel</i> ) MALDI-TOF/TOF MS | 21 proteins, 194spots                                   | <b>ZE proteomics</b>                   | Sghaier-Hammami <i>et al.</i> , 2009b |
| <i>Musa spp</i>                | 1) IMFB, NEC and EC (2) somatic embryos 0, 30, 45 and 60 days-staged and (3) Gse and non-Gse | Acetone                                                                                      | 2DE                       | ( <i>in-gel</i> ) MALDI TOF-TOF/MS | 70 in total; 16 unique for EC, 17 deps                  | SE proteomics                          | Marimuthu <i>et al.</i> , 2019        |
| <i>Elaeis guineensis</i> Jacq. | callus, globular, torpedo and cotyledonar SE and plantlet                                    | Acetone                                                                                      | Phosphoprotein enrichment | LC-MS/MS                           | 460 phosphoproteins                                     | SE phospho-proteomics                  | Aroonluk <i>et al.</i> , 2020         |
| <i>Araucaria angustifolia</i>  | proembryo, globular, torpedo, early-cotyledonary, late-cotyledonary and mature               | TCA-acetone                                                                                  | 2DE                       | LC-MS/MS                           | 96 proteins                                             | <b>ZE proteomics</b>                   | Balbuena <i>et al.</i> , 2009         |
| <i>Picea abies</i>             | PEM proliferation, embryo differentiation (early and late), maturation                       | NA                                                                                           | NA                        | GC/TOF MS                          | 52 compounds                                            | SE metabolomics                        | Businge <i>et al.</i> , 2012          |

days after pollination (DAP); differentially accumulated proteins (dap); differentially expressed proteins (dep); germinating somatic embryos (Gse); non-embryogenic calli (NEC); not applicable information (NA); primary embryogenic calli (PEC); synchronous precursor selection (SPS);weeks after flowering (WAF).  
†the type of mass spectrometry analysis carried out; we indicate in parenthesis the experiments that based the MS identification in the “in gel” digestion of the spots visualized.  
‡ indicates the number of proteins (or metabolites) that had a match in the databases, which is usually different to the total number of proteins quantified or spots visualized.

## Supplementary Table 2. Experimental data reported in the papers reviewed about somatic embryogenesis

| dicots                                                                                                                                                                                                              | monocots                                                                            | gymnosperms                                |                                                                                                                                                                                                                                                                                                                                                                                                                                                                        |                                        |
|---------------------------------------------------------------------------------------------------------------------------------------------------------------------------------------------------------------------|-------------------------------------------------------------------------------------|--------------------------------------------|------------------------------------------------------------------------------------------------------------------------------------------------------------------------------------------------------------------------------------------------------------------------------------------------------------------------------------------------------------------------------------------------------------------------------------------------------------------------|----------------------------------------|
| 1st STAGE: Ontogeny . ZE = early stages (before globular). Direct SE= induction; indirect SE = induction and proliferation (monocots: induction to early embryogenesis (embryogenic phase); gymnosperms: EC to PEM) |                                                                                     |                                            |                                                                                                                                                                                                                                                                                                                                                                                                                                                                        |                                        |
| Species                                                                                                                                                                                                             | Sampled stage                                                                       | Explant, starting material                 | Media formulation and conditions                                                                                                                                                                                                                                                                                                                                                                                                                                       | Reference                              |
| <i>Gossypium hirsutum</i> L                                                                                                                                                                                         | NEC, PEC, globular somatic embryo                                                   | Hypocotyls                                 | MSB containing 0.46 μmol/L kinetin and 0.45 μmol/L 2,4-D. NEC were maintained in MSB medium for 6 weeks at 28 °C , 16/8 h light/dark photoperiod, were subcultured in fresh MSB medium without hormones. After 3–4 weeks of growth, the somatic-to-embryogenic transition progressed to induction of PEC and globular structures.                                                                                                                                      | Guo <i>et al.</i> , 2019               |
| <i>Gossypium hirsutum</i> L                                                                                                                                                                                         | NEC, PEC, globular somatic embryo                                                   | Hypocotyls                                 | MSB containing 0.46 μmol/L kinetin and 0.45 μmol/L 2,4-D. Calli were subcultured in MSB medium without PGRs                                                                                                                                                                                                                                                                                                                                                            | Guo <i>et al.</i> , 2019b              |
| <i>Medicago truncatula</i>                                                                                                                                                                                          | Induced and proliferating calli                                                     | Leaflets                                   | Induction medium:MS salts and vitamins supplemented with 3% (w/v) sucrose, 0.4 μM 2,4-D, 0.9 μM zeatin, 0.2% (w/v) gelrite. Proliferation medium: MS salts and vitamins with 3% (w/v) sucrose and solidified with 0.2% (w/v) gelrite.                                                                                                                                                                                                                                  | Almeida <i>et al.</i> , 2012           |
| <i>Nothapodytes nimmoniana</i>                                                                                                                                                                                      | NEC and EC                                                                          | Mature zygotic embryo                      | Callus subculture: MS medium with 2,4-D + BAP (9.04 + 4.44 μM); then induction of pinkish EC: a) medium devoid of PGRs, or b) medium with BAP + 2,4-D (4.44, 6.66 or 8.88 + 2.26 μM), which resulted in the induction of globular embryos.                                                                                                                                                                                                                             | Isah and Umar , 2019                   |
| <i>Persea americana</i>                                                                                                                                                                                             | NEC and EC                                                                          | Immature zygotic embryos                   | Induction: MS medium with 30 g/L sucrose, 4 mg/L thiamine HCl 4, 100 mg/L myo-inositol, 0.41 μM picloram, 3 g/L gellan gum; pH 5.7, in darkness at 25 °C. Subculturing every two weeks on fresh medium over seven months.                                                                                                                                                                                                                                              | Olivares-García <i>et al.</i> , 2020   |
| <i>Brachypodium distachyon</i>                                                                                                                                                                                      | EC                                                                                  | Immature zygotic embryos                   | MS medium, 4 g/L EDTA-Fe, 30 g/L sucrose, 2.5 mg/L 2,4-D, 0.6 mg/L CuSO4, 2 g/L Phytigel, pH 5.8, 25 °C in the dark                                                                                                                                                                                                                                                                                                                                                    | Mamedes-Rodrigues <i>et al.</i> , 2018 |
| <i>Boesenbergia rotunda</i>                                                                                                                                                                                         | EC                                                                                  | Shoot base meristem                        | Induction: MS medium with 1 mg/L NAA, 1 mg/L IAA, 30 g/L sucrose and 2 g/L Gelrite. Propagation: MS containing 30 g/L sucrose, 2 g/L Gelrite, and various concentrations of 2,4-D.                                                                                                                                                                                                                                                                                     | Ng <i>et al.</i> , 2016                |
| <i>Elaeis guineensis</i> Jacq.                                                                                                                                                                                      | 1) explant, 2) 14 days of induction, 3) primary callus and 4)pro-embryogenic callus | Zygotic embryos from mature seeds          | Induction: MS medium supplemented with salts and vitamins, 20 g/L sucrose, 0.5 g/L glutamine, 2.5 g/L activated charcoal, 450 μM 4-amino-3,5,6-trichloro picolinic acid (Picloram), and solidified with 2.5 g/L Phytigel (Sigma®).                                                                                                                                                                                                                                     | Silva <i>et al.</i> , 2014             |
| <i>Elaeis oleifera</i> ,<br><i>E. guineensis</i>                                                                                                                                                                    | Induction stage                                                                     | Leaves                                     | MS culture solid medium (2.5 g/L Phytigel) supplemented with 30 g/L sucrose, 0.5 g/L of glutamine, 0.5 g/L of casein, 2.5 g/L activated charcoal, and 450 μM of picloram.                                                                                                                                                                                                                                                                                              | Ribeiro <i>et al.</i> , 2019           |
| <i>Musa spp.</i>                                                                                                                                                                                                    | EC and NEC induction                                                                | IMFBs                                      | Induction: MA1, medium with 4 mg/L 2, 4-D, 1 mg/L 3-IAA, 1 mg/L NAA and 30 g/L sucrose , pH 5.8, 2 g/L CleriGel. In darkness at 25 °C for 3 months. After 3–6 months of incubation, EC and NEC were observed.                                                                                                                                                                                                                                                          | Kumaravel <i>et al.</i> , 2017         |
| <i>Zea mays</i>                                                                                                                                                                                                     | EC induction                                                                        | Immature zygotic embryos from inbred lines | Induction: Modified N6 medium, in darkness at 28 °C. Immature embryos induced for 0 d were used as the control.                                                                                                                                                                                                                                                                                                                                                        | Ge <i>et al.</i> , 2017                |
| <i>Zea mays</i>                                                                                                                                                                                                     | EC and NEC                                                                          | Immature zygotic embryos from inbred lines | Induction: N6 medium supplemented with 2 mg/L 2,4-D, 600 mg/L proline, 500 mg/L casein hydrolysate, 200 mg/L L-aspartic acid, 3% sucrose and 5.8g/L agar; pH 5.8. 24 °C in the dark. Subculture medium: induction medium with 6.5 g/L D-mannitol                                                                                                                                                                                                                       | Liu <i>et al.</i> , 2018               |
| <i>Zea mays</i>                                                                                                                                                                                                     | EC and NEC                                                                          | Immature zygotic embryos from inbred lines | Induction: N6 medium supplemented with 2 mg/L 2,4-D, 700 mg/L proline, 450 mg/L casein hydrolysate, 100 mg/L myoinositol, 230 mg/L aspartic acid, 20 g/L mannitol, 3 % sucrose and 7.5 g/L agar; pH 5.8, 26 °C in the dark. Primary calli sub-culture every 2 weeks into fresh induction medium. After sub-culturing four times, the EC and NEC appeared.                                                                                                              | Sun <i>et al.</i> , 2013               |
| <i>Zea mays</i>                                                                                                                                                                                                     | EC and NEC                                                                          | Immature zygotic embryos from inbred lines | Induction: N6 medium supplemented with N6 salts, 2% sucrose, 25 mmol/L proline, 1 mg/L 2,4-D, 100 mg/L casein hydrolysate, and 1 mg/L N6 vitamins, 3 g/L Gelrite, pH 5.8; addition of 10 mg/L silver nitrate after sterilization. Maintenance of primary callus: N6 medium without silver nitrate. EC maturation: N6 medium with 1 mg/L N6 vitamins, 6% saccharose, 1 mg/L 2,4-D, 1.4 g proline, 100 mg/L casein hydrolysate and 3 mg/L Gelrite; in the dark at 28 °C. | Varhaníková <i>et al.</i> , 2014       |
| <i>Araucaria angustifolia</i>                                                                                                                                                                                       | EC                                                                                  | Globular-staged zygotic embryos            | Induction (PGR-free): BM medium with 1 g/L glutamine , 1 g/L myo-inositol, 0.5 g/L casein hydrolysate and 30 g/L sucrose, 2 g/L Phytigel. PGR-supplemented induction medium: 4 μM 2,4-D, 2 μM BAP, 2 μM KIN-BM4, 2 g/L Phytigel, pH 5.8 in darkness at 22 ± 2 °C. Subcultures after 30 days of induction, every 21 days in solid BM0 or BM2 culture medium.                                                                                                            | Fraga <i>et al.</i> , 2016             |
| <i>Araucaria angustifolia</i>                                                                                                                                                                                       | EC                                                                                  | Embryogenic suspension cultures            | Embryogenic suspension cultures in MSG medium. Subculture: fresh MSG liquid medium with 30 g/L sucrose, 1.4 g/L glutamine and 0.1 g/L myo-inositol (pH 5.7, orbital shaker at 100 rpm in the dark at 25 ± 2 °C). MSG medium was supplemented with 10 uM Mpsl inhibitor SP600125. Control medium was inhibitor-free.                                                                                                                                                    | Douéts-Peres <i>et al.</i> , 2019      |

|                                                                                                                                                                                                                                     |                          |                                                                 |                                                                                                                                                                                                                                                                                                                                                                                                                                                                                                                                                                                                                                                                                                                                                                                                                                                                                                                                                                                                                                                                                                                                      |                              |
|-------------------------------------------------------------------------------------------------------------------------------------------------------------------------------------------------------------------------------------|--------------------------|-----------------------------------------------------------------|--------------------------------------------------------------------------------------------------------------------------------------------------------------------------------------------------------------------------------------------------------------------------------------------------------------------------------------------------------------------------------------------------------------------------------------------------------------------------------------------------------------------------------------------------------------------------------------------------------------------------------------------------------------------------------------------------------------------------------------------------------------------------------------------------------------------------------------------------------------------------------------------------------------------------------------------------------------------------------------------------------------------------------------------------------------------------------------------------------------------------------------|------------------------------|
| <i>Picea balfouriana</i>                                                                                                                                                                                                            | EC                       | Zygotic embryos from mature seeds                               | Induction: solidified half-strength LM medium with 10 $\mu$ M 2,4-D and 5 $\mu$ M 6-BAP, 1% sucrose, 500 mg/L glutamine, 1 g/L casein hydrolysate, and 2% Gelrite at 24 $\pm$ 1°C in the dark. Proliferation: induction medium with three different concentrations of 6-BAP (2.5 $\mu$ M, 3.6 $\mu$ M, and 5 $\mu$ M); in darkness at 24 $\pm$ 1°C. 2-week intervals subculturing of EC (sample collection every 7 days for metabolite extraction). Early embryo differentiation: half-strength LM without PGRs for 1 week. Promotion of late embryo development and maturation: half- strength LM medium + 61 $\mu$ M ABA, 0.4% active charcoal, 6% sucrose, 500 mg/L glutamine, 1 g/L casein hydrolysate, and 4% Gelrite, in the dark at 24 $\pm$ 1°C. Somatic embryos generated from 100 mg of EC tissue with 3–5 cotyledons germinated were counted. Germination: 1/4 strength LM medium with 0.5% active charcoal, 2% sucrose, 500 mg/L glutamine, 500 mg/L casein hydrolysate, and 3% Gelrite at 24 $\pm$ 1°C in the light (30 $\mu$ Em-2s-1, 16 h photoperiod). Germinated SE with elongated root and hypocotyl were counted. | Li <i>et al.</i> , 2015      |
| <i>Pseudotsuga menziesii</i> [mirb.]                                                                                                                                                                                                | Proliferating EM         | Cotyledonary somatic embryos from 1ry and 2ry embryogenic lines | Repetitive cycles of EMs subculture in Glitz initiation/proliferation medium: Litvay medium with 4.5 $\mu$ M 2,4-D, 2.2 $\mu$ M BA, 0.087 M maltose, 4 g/L gellan gum; pH 5.8                                                                                                                                                                                                                                                                                                                                                                                                                                                                                                                                                                                                                                                                                                                                                                                                                                                                                                                                                        | Gautier <i>et al.</i> , 2018 |
| <i>Pseudotsuga menziesii</i> [mirb.]                                                                                                                                                                                                | Proliferating EM and NEC | Cotyledonary somatic embryos from 1ry somatic embryos           | Initiation medium from 1ry cotyledonary somatic embryos: Glitz medium supplemented with 4.5 $\mu$ M 2,4-D, 4.4 $\mu$ M BA, 0.087 M sucrose, 4 g/L gellan gum (darkness, 23 $^{\circ}$ C). The developed EM and NEC from the hypocotyl region were sub-cultured every 2 weeks on Glitz proliferation medium wih 4.5 $\mu$ M 2,4-D, 2.2 $\mu$ M BA and 0.087 M maltose solidified with 4 g/L gellan gum (darkness, 23 $^{\circ}$ C).                                                                                                                                                                                                                                                                                                                                                                                                                                                                                                                                                                                                                                                                                                   | Gautier <i>et al.</i> , 2019 |
| 2nd STAGE: Development . Zygotic = globular-torpedo transition/ globular to coleoptilar/gymnosperms: after suspensor elongation  Indirect SE = globular-heart-torpedo transition; monocots: late embryo; gymnosperms: after PEM III |                          |                                                                 |                                                                                                                                                                                                                                                                                                                                                                                                                                                                                                                                                                                                                                                                                                                                                                                                                                                                                                                                                                                                                                                                                                                                      |                              |

| Species                     | Sampled stage                                                | Explant, starting material                          | Media formulation and conditions                                                                                                                                                                                                                                                                                                                                                                                                                                                                                                                                                                                                                                                                                           | Reference                       |
|-----------------------------|--------------------------------------------------------------|-----------------------------------------------------|----------------------------------------------------------------------------------------------------------------------------------------------------------------------------------------------------------------------------------------------------------------------------------------------------------------------------------------------------------------------------------------------------------------------------------------------------------------------------------------------------------------------------------------------------------------------------------------------------------------------------------------------------------------------------------------------------------------------------|---------------------------------|
| <i>Cyclamen persicum</i>    | Torpedo zygotic embryo, Globular somatic embryo              | Embryogenic suspension culture initiated from PEDCs | Auxin-free medium: MS medium, Fe EDTA full strength, 2 g/L glucose, 250 mg/L peptone, 0.5 mg/L nicotinic acid, 0.1 mg/L thiamine-HCl, 0.5 mg/L pyridoxine- HCl, 100 mg/L inositol, containing either 30 or 60 g/L sucrose. 24 $^{\circ}$ C at 100 rpm in darkness                                                                                                                                                                                                                                                                                                                                                                                                                                                          | Winkelmann <i>et al.</i> , 2006 |
| <i>Cyclamen persicum</i>    | Torpedo zygotic embryo, Globular and Torpedo somatic embryos | Tubers of seedlings                                 | Induction: half-strength MS medium with 3% sucrose, 2 mg/L 2,4-dichlorophenoxy-acetic acid, 0.2 mg/L benzyladenine, 100 mg/L casein, and inositol. EC establishment on growth regulator-free medium of the same composition.                                                                                                                                                                                                                                                                                                                                                                                                                                                                                               | Bian <i>et al.</i> , 2010       |
| <i>Cyclamen persicum</i>    | Torpedo zygotic and torpedo somatic embryos                  | Embryogenic suspension culture                      | Basal medium: half-strength liquid MS medium, full strenght FeEDTA, pH 5.5–5.6, 30 g/L sucrose, 2 g/L glucose, 2.0 mg/L 2,4-D and 0.8 mg/L, 2iP. Induction of SE: growth regulator-free medium of the same basal composition with 4 g/L Gelrite; 24 $^{\circ}$ C in darkness.                                                                                                                                                                                                                                                                                                                                                                                                                                              | Rode <i>et al.</i> , 2011       |
| <i>Cyclamen persicum</i>    | EC, and globular, torpedo, cotyledonary somatic embryos      | Embryogenic suspension cultures                     | Basal medium: half-strength liquid MS medium, full strenght FeEDTA, pH 5.5–5.6, 30 g/L sucrose, 2 g/L glucose, 2.0 mg/L 2,4-D and 0.8 mg/L, 2iP. Induction of SE: basal medium, PGR-free, solidified with 4 g/L Gelrite and sucrose (30 or 60 g/L). Cells and developing somatic embryos were harvested after 0, 1, 3, 7, 21 and 28 days of incubation. 28-day-old embryos developed on medium with 30 g/L sucrose were transferred to basal medium, with or without 10 mg/L ABA; the embryos were incubated for further 28 days at 24 $^{\circ}$ C in the dark.                                                                                                                                                           | Rode <i>et al.</i> , 2012       |
| <i>Gossypium hirsutum</i> L | Globular and cotyledonary somatic embryos                    | Hypocotyls                                          | Induction: MS medium plus B5 vitamins, supplemented with 0.05 mg/L IAA, 0.05 mg/L kinetin, 0.05 mg/L 2,4-D, 25 g/L glucose, 2 g/L gelrite, pH 5.8. EC emergence: MSB medium supplemented with 25 g/L glucose, 2 g/L gelrite, 0.5 g/L MgCl <sub>2</sub> , 0.16 mg/L kinetin, 0.08 mg/L IAA, pH 6.5; changed monthly, for 4 months. Somatic embryo induction: MSB supplemented with 25 g/L glucose, 2 g/L gelrite, 0.5 g/L MgCl <sub>2</sub> , 0.08 g/L kinetin, 0.12 mg/L BA, pH 6.8. Concentration of treatments: ABA (0.01, 0.04, 0.2, 0.4, and 2.0 $\mu$ M), GA (0.28, 1.4, 2.8, 14, and 28 $\mu$ M), paclobutrazol (0.01, 0.03, 0.1, and 0.33 $\mu$ M), and JA (0.1, 0.5, 1, 2, and 10 $\mu$ M).                        | Ge <i>et al.</i> , 2015         |
| <i>Theobroma cacao</i>      | Torpedo zygotic and torpedo somatic embryo                   | Immature floral buds                                | Petals and staminodes (starting material) of immature floral buds were cultured in PCG (primary callus growth) medium supplemented with 250 mg/L glutamine, 100 mg/L myo-inositol, 1 ml/L DKW vitamin stock (100 g/L myo-inositol, 2 g/L thiamine-HCl, 1 g/L nicotinic acid and 2 g/L glycine), 20 g/L glucose, 18 $\mu$ M 2,4-D and 45.4 nM thidiazuron). Developed callus were transferred to SCG (secondary callus growth) supplemented with 0.5 ml/L DKW vitamin, 20 g/L glucose, 9 $\mu$ M 2,4-D and 1.2 $\mu$ M kinetin medium for 14 days. Then, calli were maintained for 21 days in embryo development medium which is a PGR-free medium supplemented with 1 ml/L DKW vitamins, 30 g/L sucrose and 1 g/L glucose. | Noah <i>et al.</i> , 2013       |

| 3rd STAGE: Maturation. Zygotic: accumulation of storage reserves. SE: cotyledonary stages (establishment of conversion potential) |                                                  |                                   |                                                                                                                                                                                                                                                                                  |                               |
|-----------------------------------------------------------------------------------------------------------------------------------|--------------------------------------------------|-----------------------------------|----------------------------------------------------------------------------------------------------------------------------------------------------------------------------------------------------------------------------------------------------------------------------------|-------------------------------|
| Species                                                                                                                           | Sampled stage                                    | Explant, starting material        | Media formulation and conditions                                                                                                                                                                                                                                                 | Reference                     |
| <i>Theobroma cacao</i>                                                                                                            | Late-torpedo staged somatic embryo               | Secondary somatic embryos from EC | Embryo development medium: DKW salts, vitamins (0.1 g/L myo-inositol, 2 mg/L thiamine–HCl, 1 mg/L nicotinic acid and 2 mg/L glycine), 30 g/L saccharose and 1 g/L glucose. Bioreactor cultures were kept at 28 $\pm$ 1 $^{\circ}$ C in the dark                                  | Niemenak <i>et al.</i> , 2015 |
| <i>Carica papaya</i>                                                                                                              | Somatic embryos maturatic Mature zygotic embryos |                                   | Induction: MS medium with 20 $\mu$ M 2,4-D, 30 g/L sucrose, 2 g/L Phytigel, pH 5.8, in the dark at 25 $^{\circ}$ C. Maturation: MS medium with 0.55 mM myo-inositol, 30 g /L sucrose and 60 g/L PEG at 25 $\pm$ 1 $^{\circ}$ C in the dark for 7 days, under a 16-h photoperiod. | Almeida <i>et al.</i> , 2019  |

|                               |                                                                          |                                                    |                                                                                                                                                                                                                                                                                                                                                                                                                                                                                                                                                                                                                                                         |                                       |
|-------------------------------|--------------------------------------------------------------------------|----------------------------------------------------|---------------------------------------------------------------------------------------------------------------------------------------------------------------------------------------------------------------------------------------------------------------------------------------------------------------------------------------------------------------------------------------------------------------------------------------------------------------------------------------------------------------------------------------------------------------------------------------------------------------------------------------------------------|---------------------------------------|
| <i>Phoenix dactylifera L</i>  | Mature zygotic (23 WAP) and somatic embryos                              | Leaves                                             | Induction: MS solid medium, Fe-EDTA, 50 g/L sucrose, 0.1 g/L myo-inositol, 2 mg/L glycine, 0.1 g/L glutamine, KH <sub>2</sub> PO <sub>4</sub> , adenine, 0.5 mg/L of 2,4-D, in darkness at 28 °C. Establishment of embryogenic suspensions: induction medium but liquid with 1 mg/L of 2,4-D, 30 g/L sucrose and activated charcoal, at 120 rpm, 28°C, 16/8-h (light/dark) period. Somatic embryo maturation: same composition media in agar, without 2,4-D nor activated charcoal, and sucrose at 50 g/L                                                                                                                                               | Sghaier-Hammami <i>et al.</i> , 2009a |
| <i>Saccharum spp.</i>         | Maturation of EC and NEC                                                 | Shoot apical meristem                              | Induction and proliferation: MS medium supplemented with 20 g/L sucrose, 2 g/L Phytigel, 10 µM 2,4-D, pH 5.8, 25°C in the dark. Maturation: MS medium with 20 g/L sucrose, 2 g/L Phytigel and several concentrations of activated charcoal (0.0, 0.75, 1.5 and 3.0 g/L). After 7 days, photoperiods of 16 h light (60 µmol.m <sup>-2</sup> .s <sup>-1</sup> ) were used for up to 28 days of culture.                                                                                                                                                                                                                                                   | Heringer <i>et al.</i> , 2015         |
| <i>Saccharum spp.</i>         | Maturation of somatic embryos                                            | Leaves                                             | Induction: MS medium with 20 g/L sucrose, 2 g/L Phytigel, 10 µM 2,4-D, pH of 5.8; in the dark at 25 °C. After 45 days in culture, induced calli were subcultured every 21 days in the same medium. To test polyamine effects on somatic embryo induction: MS medium supplemented with 30 g/L sucrose and 2 g/L Phytigel, and 0, 10, 100 and 500 µM of putrescine, spermidine, and spermine; kept at 25 °C in the dark for 7 days, then transferred to light for 21 days of culture to generate mature embryos. Regeneration of SE: MS medium with 30 g/L sucrose and 2 g/L Phytigel, in 16 h photoperiod (90 µmol/m <sup>2</sup> /s) for 30 days.       | Reis <i>et al.</i> , 2016             |
| <i>Phoenix dactylifera L</i>  | Maturation (on ABA and Sucrose)                                          | Friable callus                                     | Friable callus were maintained into liquid M3 medium in rotary shaker at 120 rpm, 28 °C under a 16/8-h (light/dark) photoperiod. Proembryonic masses evolved to differentiated SE with weekly subculture in medium M3. At the globular stage (stage 1; 1 month after subculturing) 0.1 g of embryos were transferred to the same culture medium M3 without (control) or with addition of ABA (5, 10, 20 and 40 µM for 4 weeks) or more sucrose (30 and 90 g/L) to the M3 medium (which initially contained of 30 g/L sucrose). Embryos were transferred weekly to fresh medium with or without additives until the structured embryo stage was reached. | Sghaier-Hammami <i>et al.</i> , 2010  |
| <i>Araucaria angustifolia</i> | Proliferating EC                                                         | Immature zygotic embryos of embryogenic cell lines | Induction: BM medium (Gupta and Pullman, 1991) with 5 µM 2,4-D, 2 µM 6-BA, 2 µM kinetin (darkness at 25 °C). Proliferation: subculture in semi-solid MSG. Maturation medium I: 100 mg (fresh weight) EC on filter papers transferred to basic MSG, solidified with 3 g/L Gelrite®, 1.46 g/L glutamine, 30 g/L sucrose, 3 g/L activated charcoal, 70 g/L maltose, 90 g/L PEG 4000 (in darkness at 25°C). Maturation medium II: maturation medium I with 120 µM ABA.                                                                                                                                                                                      | Jo <i>et al.</i> , 2014               |
| <i>Pinus pinaster</i>         | Cotyledonary somatic and cotyledonary zygotic embryos                    | Immature zygotic embryos of embryogenic lines      | Proliferation medium: mLV supplemented with 3 g/L gellan gum, 0.087 M sucrose, 2 µM 2,4-D, 1 µM benzyladenine (BA). Maturation: mLV without PGR, supplemented with 0.2 M sucrose, 80 µM ABA and 9 g/L gellan gum.                                                                                                                                                                                                                                                                                                                                                                                                                                       | Morel <i>et al.</i> , 2014b           |
| <i>Pinus pinaster</i>         | Cotyledonary somatic embryos                                             | Immature zygotic embryos of embryogenic lines      | Proliferation medium: mLV supplemented with 3 g/L gellan gum, 0.087 M sucrose, 2 µM 2,4-D, 1 µM benzyladenine (BA). Maturation: mLV without PGR, supplemented with 0.2 M sucrose, 80 µM ABA and either 4 or 9 g/L gellan gum.                                                                                                                                                                                                                                                                                                                                                                                                                           | Morel <i>et al.</i> , 2014a           |
| <i>Picea abies</i>            | Mature zygotic embryos                                                   | EC from embryogenic cell lines                     | EC subculture (2-week interval): half-strength LP solid medium with 9.0 µM 2,4-D and 4.4 µM N6-benzaldenine; proliferation of embryogenic structures after 5-8 weeks. Early embryo differentiation from PEMs: half strength LP-medium lacking PGRs. Promotion of late embryo development and maturation: DKM medium with 29 µM ABA, with either 3% (w/v) sucrose or 3% (w/v) maltose and 7.5% (w/v) PEG.                                                                                                                                                                                                                                                | Businge <i>et al.</i> , 2013          |
| <i>Picea glauca</i>           | Maturation of somatic embryos                                            | Mature zygotic embryos                             | Induction: AE medium with 10 mM 2,4-D, 5 mM BA, 5% (w/v) sucrose, and 0.4% Difco Bacto-agar, pH 5.8. Embryogenic tissues were transferred on maintenance medium: AE medium containing 10 mM 2,4-D, 2 mM BA, and 3% sucrose, pH 5.8. Promotion of embryo development: 1 week in AE medium without PGRs, then, 50 mg of tissue plated on maturation medium: AE medium containing 50 mM ABA and 5% sucrose, 0.8% agar                                                                                                                                                                                                                                      | Dowlatabadi <i>et al.</i> , 2009      |
| DEVELOPMENTAL SERIES          |                                                                          |                                                    |                                                                                                                                                                                                                                                                                                                                                                                                                                                                                                                                                                                                                                                         |                                       |
| <i>Gossypium hirsutum L</i>   | Explant, NEC, ECs and somatic embryos (globular, torpedo and cotyledon)  | Hypocotyls                                         | Induction: MSB medium with 1.0 mg/L IBA and 0.1 mg/l kinetin. After 40 days, induction of EC: MSB medium containing twice the concentration of KNO <sub>3</sub> , NH <sub>4</sub> NO <sub>3</sub> free, supplemented with 3% (w/v) glucose, 0.25% (w/v) Phytigel, 0.5 mg/L IBA, 0.15 mg/L kinetin, 1 g/L glutamine, and 0.5 g/L asparagine. Cultures maintained at 28 °C, 14-h photoperiod (irradiance of 135 µmol m <sup>-2</sup> s <sup>-1</sup> ).                                                                                                                                                                                                   | Zhou <i>et al.</i> , 2016             |
| <i>Silybum marianum L.</i>    | NEC, PEM, globular or cotyledonary somatic embryos, plantlet germination | Petiole explant from in-vitro germinated seedlings | Induction: SH medium with 3 % sucrose (w/v) and 0.8 % (w/v) agar in 150 ml conical flask supplemented with (0.5, 1.5, 2.5, 5.0 or 8.0 mg/L) of 2,4-D or BA alone or 1.5 mg/L BA with 2,4-D (0.5, 1.5, 2.5, 5.0 or 8.0 mg/L), pH 5.8, 16 h photoperiod (40 µmol m <sup>-2</sup> s <sup>-1</sup> ) at 25 °C. Control medium was PGR free. After 4 weeks induction, callus producing PEMs were transferred into SH medium containing (0.5, 1.5, 2.5, 5.0 or 8.0mg/L) of 2,4-D or BA alone, or 1.5mg/L BA in combination with 2,4-D (0.5, 1.5, 2.5, 5.0 or 8.0 mg/L). Germination medium: half strength MS medium with (0.0, 0.5, 1.5 or 2.0 mg/L) of GA.   | Khan <i>et al.</i> , 2015             |
| <i>Quercus suber L.</i>       | Proliferative, cotyledonary and mature somatic embryos                   | Immature zygotic embryos                           | Basal culture medium: MS with ascorbic acid, nicotinic acid, glutamine, calcium pantothenate, pyridoxine-HCl and thiamine-HCl, sucrose and 2,4-D, pH 5.7. Induction medium: basal medium, 8 g/L agar and 22.6 mM 2,4-D. Proliferation stage in PGR-free medium. Maturation of cotyledonar embryos: basal culture medium plus 1% activated charcoal.                                                                                                                                                                                                                                                                                                     | Gomez-Garay <i>et al.</i> , 2013      |

|                                |                                                                                              |                                |                                                                                                                                                                                                                                                                                                                                                                                                                                                                                                                                                                                                                                                                                                                                                                                                                                                                                                                                                                                                                                                                                                                                                                                                                                                                                                                                                                                                                                                                                                                                                                                                                                                                                                                                                                 |                                |
|--------------------------------|----------------------------------------------------------------------------------------------|--------------------------------|-----------------------------------------------------------------------------------------------------------------------------------------------------------------------------------------------------------------------------------------------------------------------------------------------------------------------------------------------------------------------------------------------------------------------------------------------------------------------------------------------------------------------------------------------------------------------------------------------------------------------------------------------------------------------------------------------------------------------------------------------------------------------------------------------------------------------------------------------------------------------------------------------------------------------------------------------------------------------------------------------------------------------------------------------------------------------------------------------------------------------------------------------------------------------------------------------------------------------------------------------------------------------------------------------------------------------------------------------------------------------------------------------------------------------------------------------------------------------------------------------------------------------------------------------------------------------------------------------------------------------------------------------------------------------------------------------------------------------------------------------------------------|--------------------------------|
| <i>Musa spp</i>                | 1) IMFB, NEC and EC (2) somatic embryos 0, 30, 45 and 60 days-staged and (3) Gse and non-Gse | IMFBs                          | Callus induction medium supplemented with 1 mg/L IAA, 1 mg/L NAA and 4 mg/L 2,4-D, and different concentrations of calcium chloride (10, 15 and 20 mM) for calcium-related proteins induction. Incubation in darkness at $25 \pm 2^\circ\text{C}$ up to 8 months without subculture. EC and NEC samples were collected in triplicates. Friable PEM of EC were transferred to liquid suspension medium supplemented with 1.1 mg/L 2,4-D and 250 $\mu\text{g/L}$ zeatin. One milliliter of embryonic cell suspension was plated on somatic embryo regeneration medium supplemented with 200 $\mu\text{g/L}$ NAA, 80 $\mu\text{g/L}$ kinetin, and 40 $\mu\text{g/L}$ zeatin; in darkness at $25 \pm 2^\circ\text{C}$ . Samples of somatic embryos (at 0, 30, 45 and 60 days after initiation) were collected in triplicates. Well-developed somatic embryos were transferred to germination medium supplemented with 0.5 mg/L BAP and 2 mg/L IAA; fluorescent light of 40.54 $\mu\text{mol m}^{-2} \text{s}^{-1}$ with a photoperiod of 16/8 (light/dark) at $25 \pm 2^\circ\text{C}$ . After 90 days, the Gse (with shoots and with both shoots and roots) and NGses (without shoot and roots) were collected in triplicates. To stimulate endogenous auxin, different concentrations of Trp were added (122.41, 244.82 and 489.64 $\mu\text{M}$ ) and IAA concentration was increased from 5.7 to 11.41 $\mu\text{M}$ , 17.12 and 22.8 $\mu\text{M}$ . To induce endogenous cytokinins, adenylate types of cytokinins like BAP (2.21 and 4.43 $\mu\text{M}$ ) and kinetin (2.32 and 4.64 $\mu\text{M}$ ) were added separately and in combination (2.21 $\mu\text{M}$ BAP + 2.32 $\mu\text{M}$ kinetin and 4.43 $\mu\text{M}$ BAP + 4.64 $\mu\text{M}$ kinetin). | Marimuthu <i>et al.</i> , 2019 |
| <i>Elaeis guineensis</i> Jacq. | callus, globular, torpedo and cotyledonar somatic embryos and plantlet                       | Immature zygotic embryos       | Callus induction under dark conditions on N6 medium pH 5.75 containing 2 mg/L of 2,4-D, 30 g/L of sucrose, and 2 g/L of phytigel; subculture every month for 3–5 months until differentiation of globular structures. Establishment: N6 medium with 0.1 mg/L of 2,4-D, 0.16 g/L of putrescine, 0.5 g/L of casein amino acids, 30 g/L sucrose, 2 g/L phytigel, and 2 g/L activated charcoal under cool-white fluorescent lamp (50–60 $\mu\text{mol m}^{-2} \text{s}^{-1}$ ) for 16 h photoperiod. Regeneration: small shoot transferred to a modified N6 medium containing 0.5 g/L activated charcoal and 30 g/L sucrose under same photoperiod light condition.                                                                                                                                                                                                                                                                                                                                                                                                                                                                                                                                                                                                                                                                                                                                                                                                                                                                                                                                                                                                                                                                                                 | Aroonluk <i>et al.</i> , 2020  |
| <i>Picea abies</i>             | PEM proliferation, embryo differentiation (early and late), maturation                       | EC from embryogenic cell lines | EC subculture (2-week interval): half-strength LP solid medium with 9.0 $\mu\text{M}$ 2,4-D and 4.4 $\mu\text{M}$ N6-benzaldehyde. After 5–8 weeks embryogenic structures started to proliferate. Early embryo differentiation from PEMs: half strength LP-medium lacking PGRs. Promotion of late embryo development and maturation: DKM medium with 29 $\mu\text{M}$ ABA.                                                                                                                                                                                                                                                                                                                                                                                                                                                                                                                                                                                                                                                                                                                                                                                                                                                                                                                                                                                                                                                                                                                                                                                                                                                                                                                                                                                      | Businge <i>et al.</i> , 2012   |

1-Naphthaleneacetic acid (NAA); 2,4-dichlorophenoxyacetic acid (2,4-D); 6-benzylaminopurine (BA); abscisic acid (ABA); embryogenic calli (EC); germinating somatic embryos (Gse); gibberellic acid (GA); immature male flower buds (IMFB); Indole 3-acetic acid (3-IAA); jasmonic acid (JA); MS medium plus B5 vitamin (MSB); non-embryogenic calli (NEC); polyethylene glycol (PEG); pre-embryoid masses (PEMs); primary embryogenic calli (PEC); Schenk and Hildebrandt (SH); tryptophan (Trp)
